# Supplementary material for: Mobility driven thermoelectric and optical properties of two-dimensional halide-based hybrid perovskites: impact of organic cation rotation
Source: Royal Society of Chemistry journal article supplement (doi:10.1039/d1cp05724c), 2022-01-01
Supplement: d1cp05724c1.pdf [file d1cp05724c1.pdf]

## Mobility Driven Thermoelectric and Optical Properties of Two-Dimensional Halide-based Hybrid Perovskites: Impact of Organic Cation Rotation

Hardik L. Kagdada<sup>1</sup>, Sanjeev K. Gupta<sup>2</sup>, Satyaprakash Sahoo<sup>3,4</sup>, and Dheeraj K. Singh<sup>1,\*</sup>

<sup>1</sup>Department of Basic Sciences, Institute of Infrastructure Technology Research And Management (IITRAM), Ahmedabad 380026, India

<sup>2</sup>Computational Materials and Nanoscience Group, Department of Physics, St. Xavier's College, Ahmedabad 380009, India

<sup>3</sup>Institute of Physics, Bhubaneswar 751005, India

<sup>4</sup>Homi Bhabha National Institute, Mumbai 400085, India

\*Corresponding author: [dheerajsingh84@gmail.com](mailto:dheerajsingh84@gmail.com); [dheerajsingh@iitram.ac.in](mailto:dheerajsingh@iitram.ac.in)

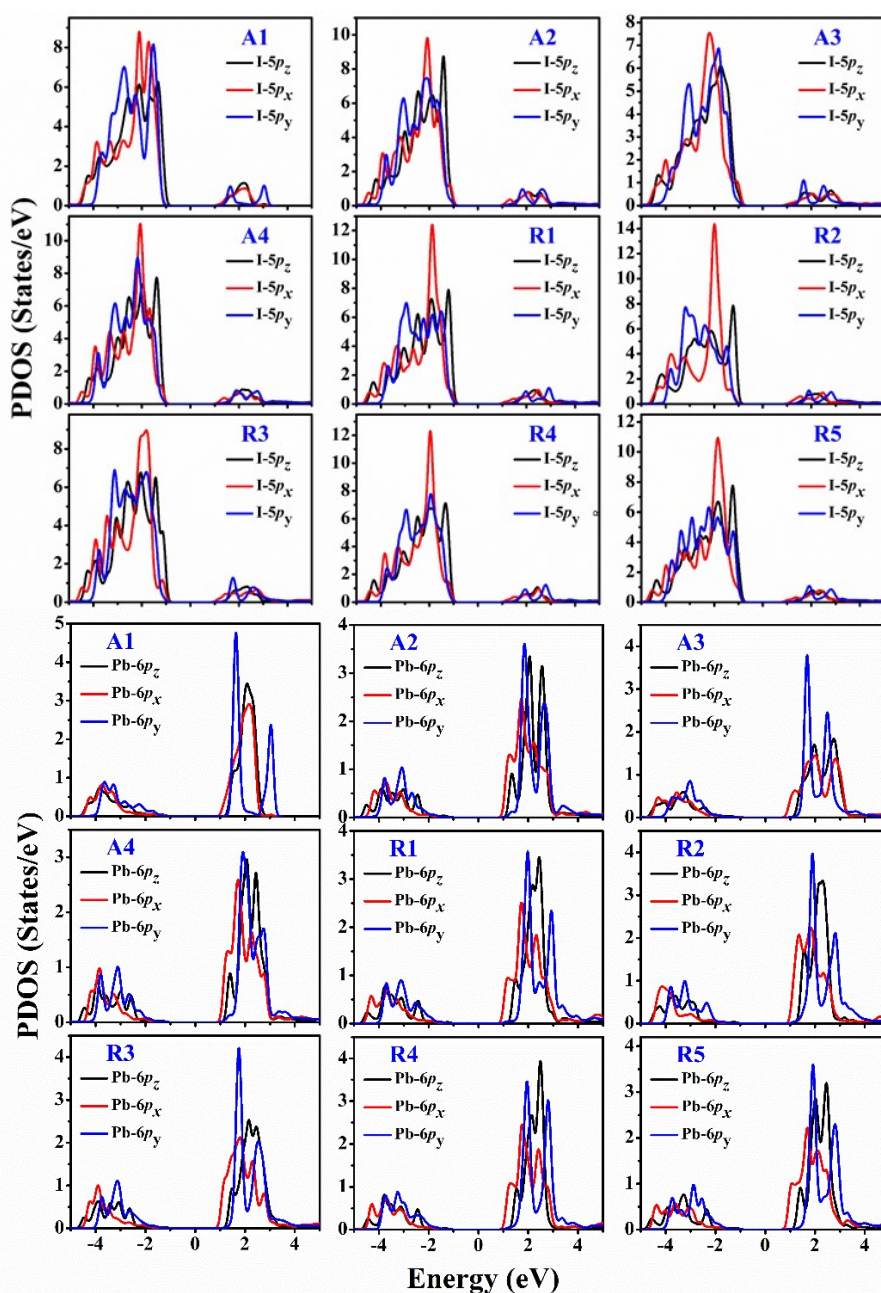

**Figure S1.** Projected density of states (PDOS) with the projection of I-5( $p_x$ ,  $p_y$  and  $p_z$ ) and Pb-6( $p_x$ ,  $p_y$  and  $p_z$ ) orbitals for each MA cation rotation in Pb-I network. Fermi level located at 0 eV.

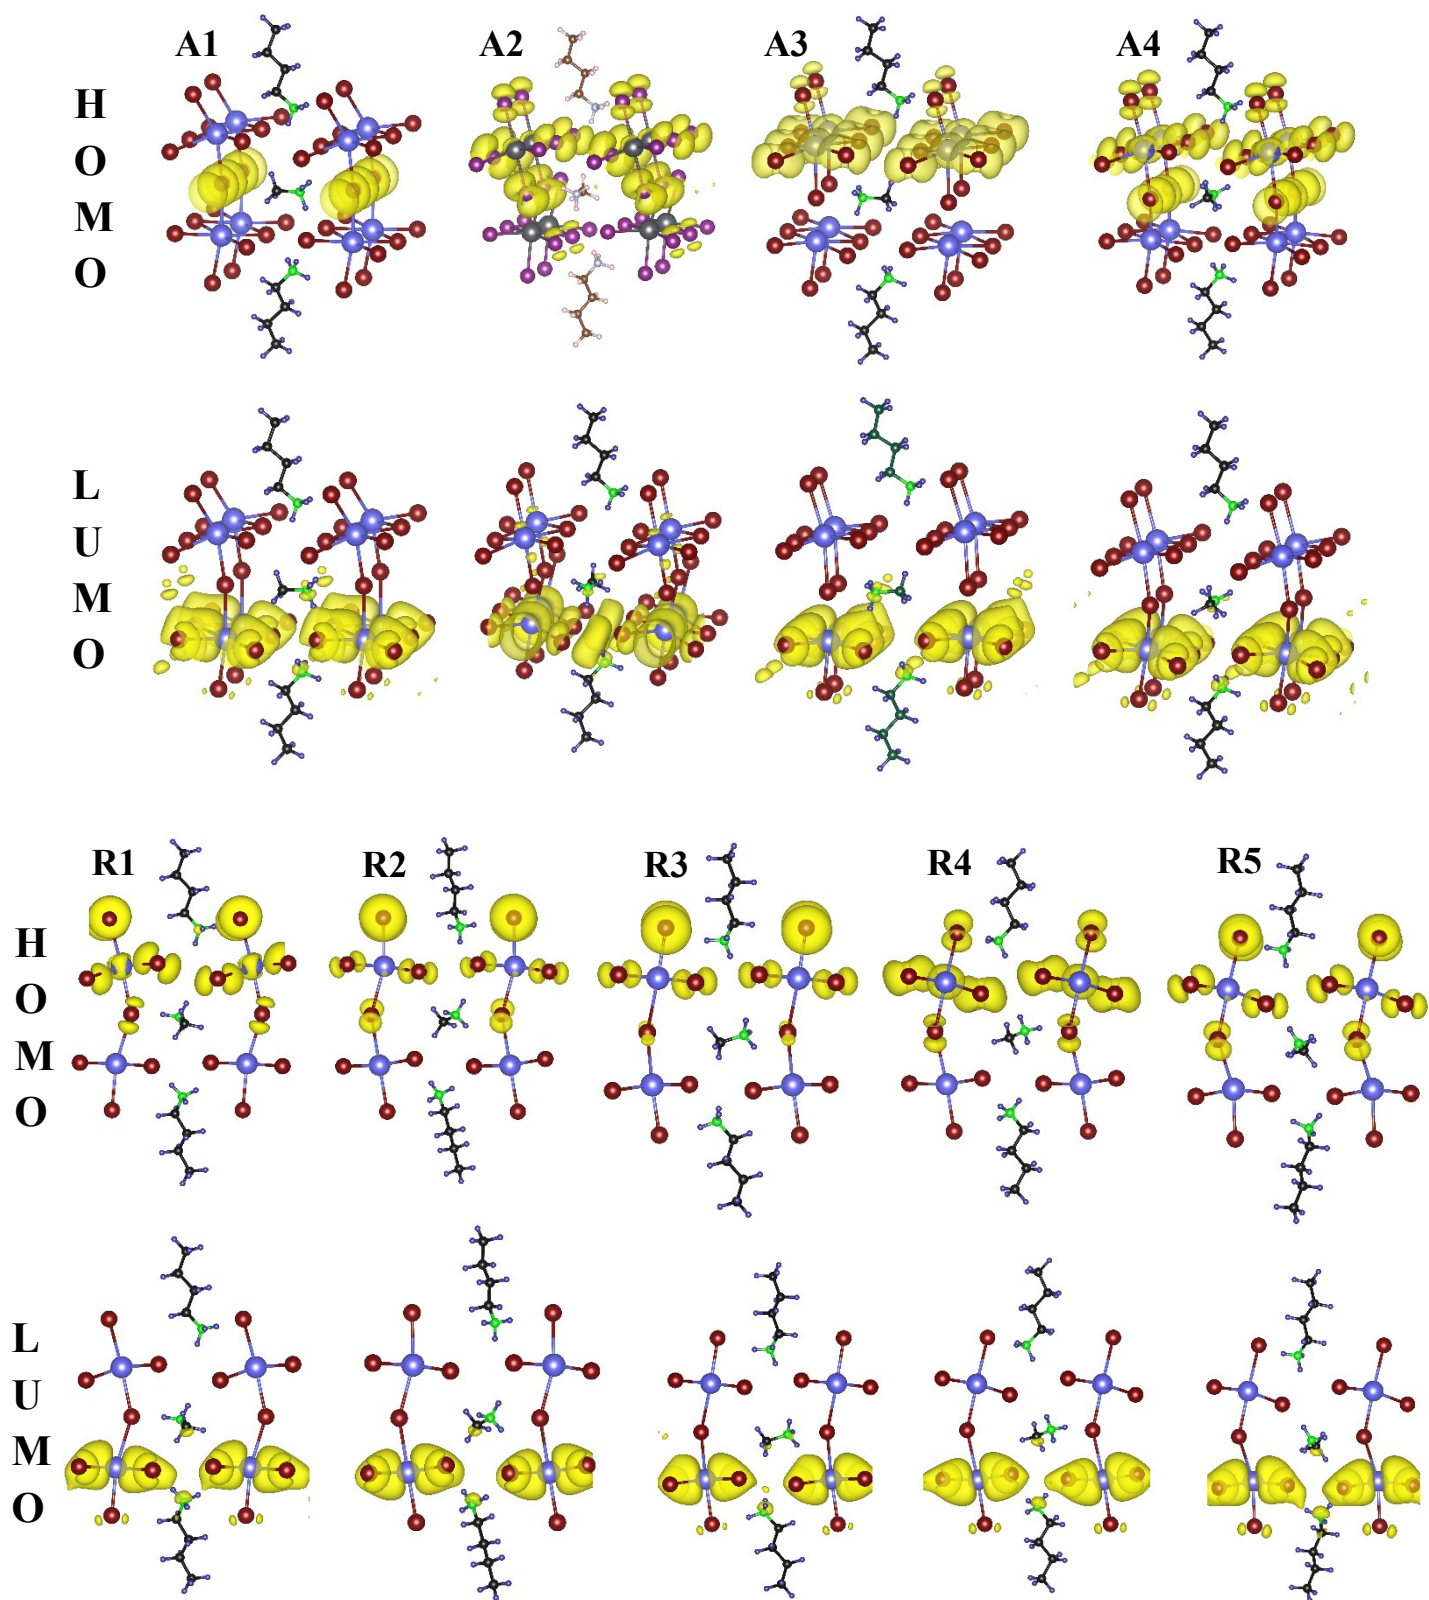

**Figure S2.** Charge density iso-surfaces (for HOMO and LUMO level) (without SOC) with MA cation rotation.

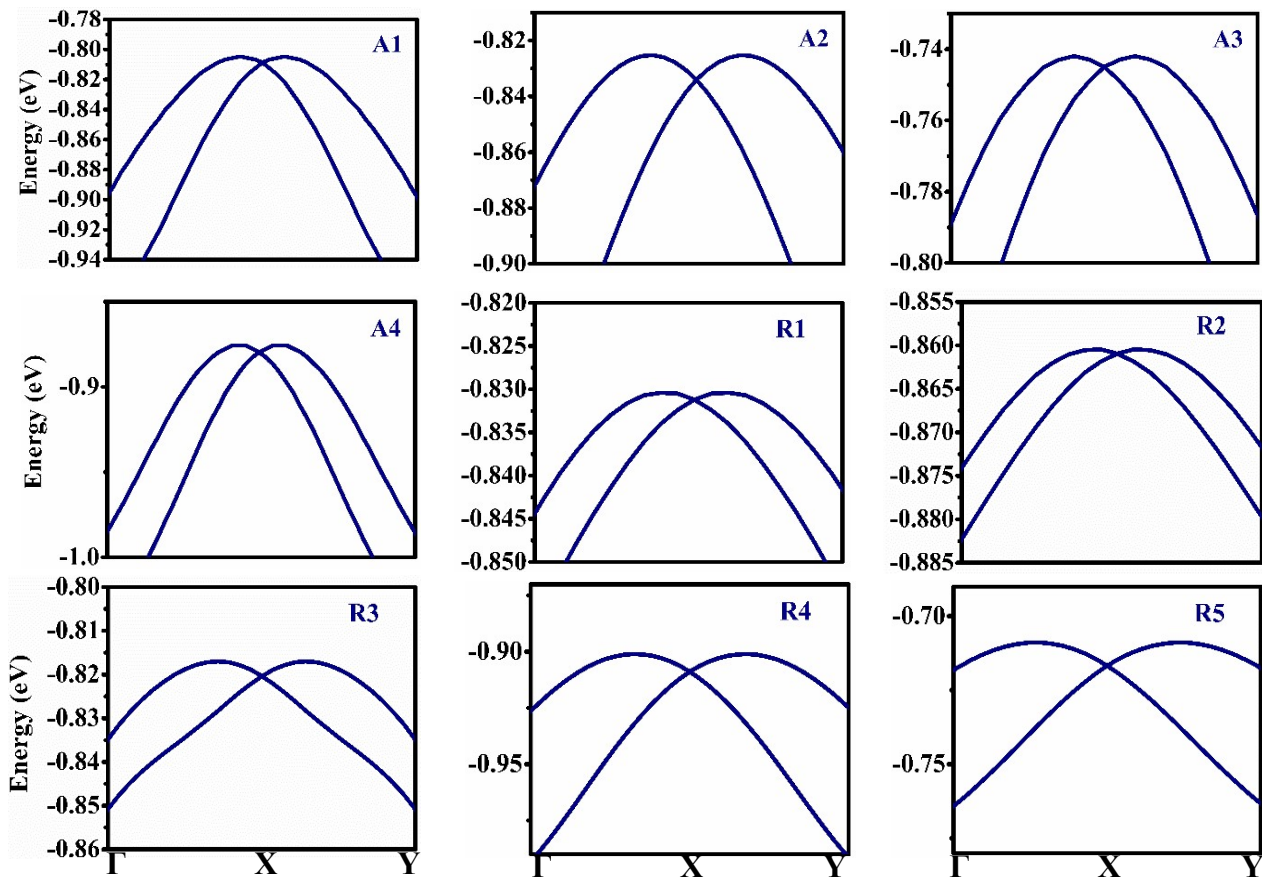

**Figure S3.** Part of the valence band structure (along the  $\Gamma$ -X-Y high symmetry direction of BZ for A1-A4 and R1-R5 structures) calculated with spin-orbit coupling (SOC) effects for visualization of Rashba splitting with the rotation of MA cation.

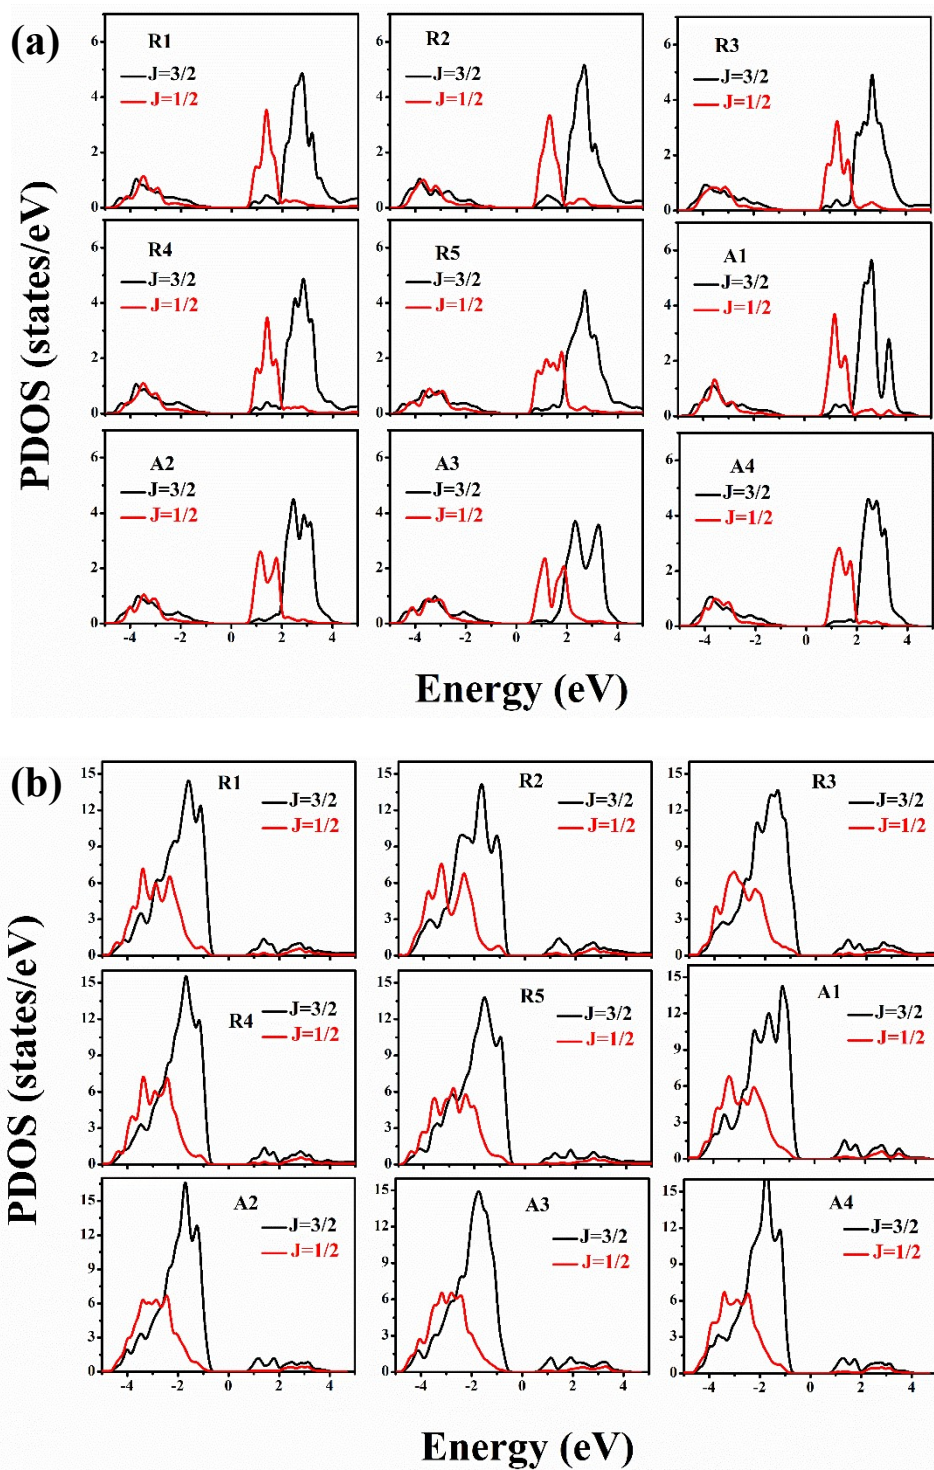

**Figure S4.** SOC-Projected density of states (PDOS) (a) Pb-6p and (b) I-5p orbitals including spin orbit coupling effects for A1-A4 structures (symmetric rotation of MA cation) and R1-R5 (Random rotation of MA cation). Fermi level located at 0 eV.

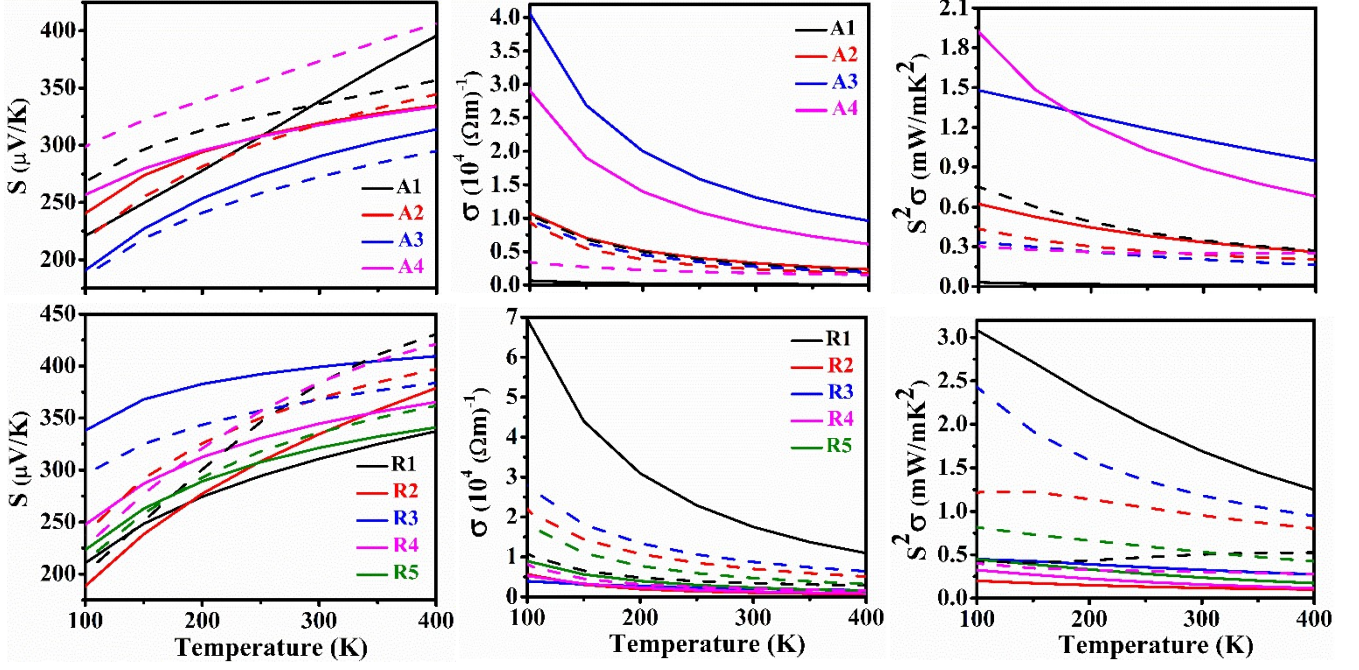

**Figure S5.** Anisotropic transport coefficients (for holes) Seebeck coefficients ( $S$ ), electrical conductivity ( $\sigma$ ) and thermoelectric power factor ( $S^2\sigma$ ) for rotation A1-A4 (upper panel) and R1-R5 (lower panel) respectively. Here solid and dashed lines determine the respective transport properties along x and z-axis of structure, respectively.

The electrical conductivity and Seebeck coefficients have been calculated using BoltzTrap code through following expressions<sup>1,2</sup>:

$$S_{\alpha\beta}(\varepsilon, T, \mu_c) = \frac{\int_{-\infty}^{\infty} g(\varepsilon)(\varepsilon - \mu_c) \left[ \frac{-\partial f(T, \varepsilon, \mu_c)}{\partial \varepsilon} \right] d\varepsilon}{T \int_{-\infty}^{\infty} g(\varepsilon) \left[ \frac{-\partial f(T, \varepsilon, \mu_c)}{\partial \varepsilon} \right] d\varepsilon} \quad (1)$$

$$\sigma_{\alpha\beta} = \frac{1}{\Omega} \int \sigma_{\alpha\beta}(\varepsilon) \left[ -\frac{\partial f_{\mu_c}(T; \varepsilon)}{\partial \varepsilon} \right] \partial \varepsilon \quad (2)$$

Where  $\sigma_{\alpha\beta}(\varepsilon_{i,k}) = e^2 \tau_{i,k} v_{\alpha}(i,k) v_{\beta}(i,k)$ , while  $g(\varepsilon)$  determines the transport function. Here,  $\varepsilon_{i,k}$  represents the band energy for  $i^{th}$  band at  $k$  wavevector.  $\alpha$  and  $\beta$  are the components of the conductivity tensor, while  $\mu_c$ ,  $T$  and  $\Omega$  depicts the chemical potential, temperature and volume of cell.

## References

1. D. Parker and D. J. Singh, Thermoelectric Properties of AgGaTe<sub>2</sub> and Related Chalcopyrite Structure Materials. Phys. Rev. B., (2012) **85**, 125209.

2. G. K. H. Madsen and D. J. Singh, BoltzTraP: A Code for Calculating Band-Structure Dependent Quantities. *Comput. Phys. Commun.* 2006, **175**, 67–71.
